# Supplementary material for: The presence of highly disruptive 16S rRNA mutations in clinical samples indicates a wider role for mutations of the mitochondrial ribosome in human disease
Source: PubMed Central journal article supplement (PMC4665369; doi:10.1016/j.mito.2015.08.004), 2015-11
Supplement: mmc3.pdf [file mmc3.pdf]

| RCSB Title                                                                                                                                                                                | Accession codes:<br>SSU, LSU                                                           | Ribosomal<br>composition | rotation state | mRNA | tRNA                                    | other ligands    | Res. (Å) | Refinement Parameters                  | Organism                        | Phylogenetic Domain | Ref  | PubMed ID |
|-------------------------------------------------------------------------------------------------------------------------------------------------------------------------------------------|----------------------------------------------------------------------------------------|--------------------------|----------------|------|-----------------------------------------|------------------|----------|----------------------------------------|---------------------------------|---------------------|------|-----------|
| Structure of the large ribosomal subunit from human mitochondria                                                                                                                          | <a href="#">3J7Y</a>                                                                   | LSU                      | NA             | N    | N                                       | N                | 3.4      | NA                                     | <i>Homo sapiens</i>             | Mitochondrial       | [1]  | 25278503  |
| 39S large subunit of the porcine mitochondrial ribosome                                                                                                                                   | <a href="#">4CE4</a>                                                                   | LSU                      | NA             | N    | N                                       | N                | 4.9      | NA                                     | <i>Sus scrofa</i>               | Mitochondrial       | [2]  | 24362565  |
| Cryo-EM structure of the small subunit of the mammalian mitochondrial ribosome.                                                                                                           | <a href="#">3J6V</a>                                                                   | SSU                      | NA             | N    | N                                       | N                | 7        | NA                                     | <i>Bos taurus</i>               | Mitochondrial       | [3]  | 24799711  |
| Structure of the yeast mitochondrial large ribosomal subunit.                                                                                                                             | <a href="#">1VW3</a>                                                                   | LSU                      | NA             | N    | N                                       | N                | 3.2      | NA                                     | <i>Saccharomyces cerevisiae</i> | Mitochondrial       | [4]  | 24675956  |
| The re-refined crystal structure of the Haloarcula marismortui large ribosomal subunit at 2.4 Angstrom resolution: more complete structure of the L7/L12 and L1 stalk, L5 and LX proteins | <a href="#">4HUB</a>                                                                   | LSU                      | NA             | N    | none                                    | none             | 2.4      | R-Value: 0.166 (obs.)<br>R-Free: 0.206 | <i>Haloarcula marismortui</i>   | Archaea             | [5]  | 23695244  |
| Control of ribosomal subunit rotation by elongation factor G                                                                                                                              | <a href="#">4KIX</a> <a href="#">4KIY</a>                                              | SSU/LSU                  | ratcheted      | N    | none                                    | EFG, viomycin    | 2.9      | R-Value: 0.223 (work)<br>R-Free: 0.271 | <i>Escherichia coli</i>         | Bacteria            | [6]  | 23812721  |
| Structure of the <i>Thermus thermophilus</i> 70S ribosome complexed with mRNA, tRNA and paromomycin                                                                                       | <a href="#">2J00</a> <a href="#">2J01</a>                                              | SSU/LSU                  | non-ratcheted  | Y    | A(ASL <sup>%</sup> ), P, E              | paromomycin      | 2.8      | R-Value: 0.271 (obs.)<br>R-Free: 0.313 | <i>Thermus thermophilus</i>     | Bacteria            | [7]  | 16959973  |
| The structure of the ribosome with Elongation Factor G trapped in the post-translocational state                                                                                          | <a href="#">2WR1</a> <a href="#">2WRJ</a><br><a href="#">2WRK</a> <a href="#">2WRL</a> | SSU/LSU                  | non-ratcheted  | Y    | P, E                                    | EFG-fusidic acid | 3.60     | R-Value: 0.227 (obs.)<br>R-Free: 0.260 | <i>Thermus thermophilus</i>     | Bacteria            | [8]  | 19833919  |
| Structure of the <i>Thermus thermophilus</i> 70S ribosome in complex with mRNA, paromomycin, acylated A- and P-site tRNAs, and E-site tRNA                                                | <a href="#">2WDK</a> <a href="#">2WDL</a>                                              | SSU/LSU                  | non-ratcheted  | Y    | aa-A <sup>8</sup> ,aa-P <sup>8</sup> ,E | paromomycin      | 3.5      | R-Value: 0.208 (obs.)<br>R-Free: 0.256 | <i>Thermus thermophilus</i>     | Bacteria            | [9]  | 19363482  |
| Crystal structure of the ribosome bound to elongation factor G in the guanosine triphosphatase state                                                                                      | <a href="#">4JUW</a> <a href="#">4JUX</a>                                              | SSU/LSU                  | ratcheted      | Y    | P/E hybrid state tRNA                   | EF-G, GDPCP      | 2.86     | R-Value: 0.220 (obs.)<br>R-Free: 0.250 | <i>Thermus thermophilus</i>     | Bacteria            | [10] | 19363482  |
| The structure of the eukaryotic ribosome at 3.0 a resolution                                                                                                                              | <a href="#">3USB</a> <a href="#">3USC</a><br><a href="#">3USD</a> <a href="#">3USE</a> | SSU/LSU                  | ratcheted      | N    | none                                    | none             | 3.0      | R-Value: 0.182 (obs.)<br>R-Free: 0.228 | <i>Saccharomyces cerevisiae</i> | Eucarya             | [11] | 22096102  |

% A(ASL) = A-site anticodon stem loop<sup>7</sup>.

& aa = aminoacylated
